# Supplementary material
Source: HighWire-hosted journal article supplement (https://thorax.bmj.com/content/75/3/237)
Supplement: inline-supplementary-material-1 [file inline-supplementary-material-1.pdf]

## Appendix 1

**Figure S1: Log-minus-log plot for lobectomy and SABR 6 months after date of procedure and Schoenfeld p-value.**

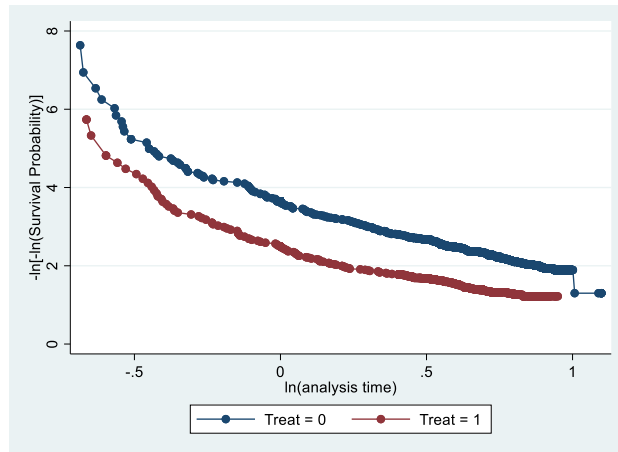

Test of proportional-hazards assumption

Time: Time

|             | chi2  | df | Prob>chi2 |
|-------------|-------|----|-----------|
| global test | 11.35 | 16 | 0.7874    |

**Figure S2: Log-minus-log plot for lobectomy and SABR 6 months after date of diagnosis and Schoenfeld p-value**

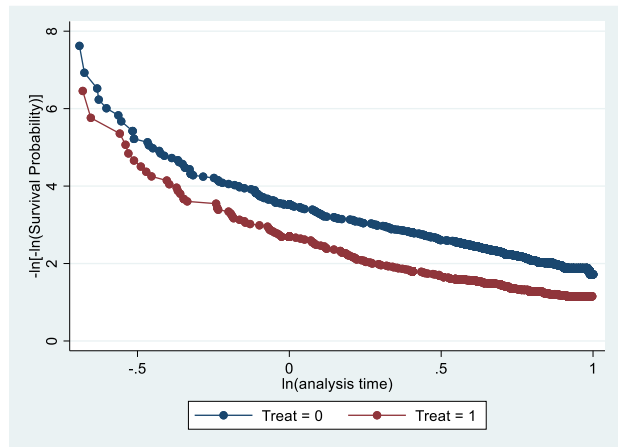

Test of proportional-hazards assumption

Time: Time

|             | chi2  | df | Prob>chi2 |
|-------------|-------|----|-----------|
| global test | 12.65 | 16 | 0.6978    |

**Table S1: Regression analysis from date of procedure till death at 90 days, 6 months, one year and overall in patients aged <80 years, PS 0 or 1 and stage IA only**

|                                      | Total number of patients | Adjusted odds ratio at 90 days after procedure (95% CI) | Adjusted odds ratio at 180 days after procedure (95% CI) | Adjusted odds ratio at 365 days after procedure (95% CI) | Adjusted odd ratios at 730 days after procedure (95% CI)‡ |
|--------------------------------------|--------------------------|---------------------------------------------------------|----------------------------------------------------------|----------------------------------------------------------|-----------------------------------------------------------|
| <b>Type of Treatment</b>             |                          |                                                         |                                                          |                                                          |                                                           |
| Lobectomy                            | 954                      | 1                                                       | 1                                                        | 1                                                        | 1                                                         |
| SABR                                 | 138                      | 0.42 (0.05 - 3.40)                                      | 1.30 (0.30 - 5.51)                                       | 2.42 (1.03 - 5.67)                                       | 2.00 (1.03 - 3.87)                                        |
| <b>Sex</b>                           |                          |                                                         |                                                          |                                                          |                                                           |
| Female                               | 613                      | 1                                                       | 1                                                        | 1                                                        | 1                                                         |
| Male                                 | 479                      | 1.63 (0.52 - 5.14)                                      | 1.83 (0.77 - 4.35)                                       | 1.72 (0.97 - 3.06)                                       | 1.99 (1.31 - 3.02)‡                                       |
| <b>Age</b>                           |                          |                                                         |                                                          |                                                          |                                                           |
| <65                                  | 352                      | 1                                                       | 1                                                        | 1                                                        | 1                                                         |
| 65-80                                | 740                      | 2.21 (0.47 - 10.3)                                      | 1.46 (0.52 - 4.09)                                       | 1.32 (0.68 - 2.57)                                       | 1.27 (0.79 - 2.05)                                        |
| <b>Performance status</b>            |                          |                                                         |                                                          |                                                          |                                                           |
| 0                                    | 553                      | 1                                                       | 1                                                        | 1                                                        | 1                                                         |
| 1                                    | 539                      | 0.96 (0.30 - 3.02)                                      | 1.32 (0.54 - 3.24)                                       | 1.51 (0.82 - 2.77)                                       | 1.82 (1.17 - 2.84)‡                                       |
| <b>Charlson Index</b>                |                          |                                                         |                                                          |                                                          |                                                           |
| 0                                    | 420                      | 1                                                       | 1                                                        | 1                                                        | 1                                                         |
| 1                                    | 256                      | 0.54 (0.05 - 5.26)                                      | 0.37 (0.07 - 1.77)                                       | 1.25 (0.58 - 2.69)                                       | 1.15 (0.65 - 2.04)                                        |
| 2-3                                  | 253                      | 2.57 (0.59 - 11.1)                                      | 1.16 (0.40 - 3.36)                                       | 0.87 (0.38 - 1.95)                                       | 1.21 (0.69 - 2.09)                                        |
| 4+                                   | 163                      | 3.20 (0.68 - 15.0)                                      | 1.44 (0.47 - 4.44)                                       | 1.46 (0.66 - 3.23)                                       | 1.35 (0.74 - 2.46)                                        |
| <b>Socioeconomic Status</b>          |                          |                                                         |                                                          |                                                          |                                                           |
| 1                                    | 168                      | 1                                                       | 1                                                        | 1                                                        | 1                                                         |
| 2                                    | 204                      | -                                                       | 1.50 (0.27 - 8.42)                                       | 2.44 (0.64 - 9.28)                                       | 1.54 (0.66 - 3.58)                                        |
| 3                                    | 230                      | -                                                       | 1.39 (0.25 - 7.79)                                       | 2.55 (0.68 - 9.54)                                       | 1.64 (0.71 - 3.76)                                        |
| 4                                    | 236                      | -                                                       | 2.15 (0.42 - 11.0)                                       | 3.33 (0.92 - 11.9)                                       | 1.96 (0.87 - 4.39)                                        |
| 5 (most deprived)                    | 254                      | -                                                       | 2.27 (0.45 - 11.3)                                       | 3.92 (1.10 - 13.9)                                       | 2.98 (1.37 - 6.50)‡                                       |
| <b>Pathology confirmed diagnosis</b> |                          |                                                         |                                                          |                                                          |                                                           |
| No                                   | 73                       | 1                                                       | 1                                                        | 1                                                        | 1                                                         |
| Yes                                  | 1019                     | -                                                       | 1.33 (0.19 - 9.15)                                       | 1.47 (0.46 - 4.63)                                       | 1.13 (0.47 - 2.67)                                        |
| <b>Laterality</b>                    |                          |                                                         |                                                          |                                                          |                                                           |
| Left                                 | 439                      | 1                                                       | 1                                                        | 1                                                        | 1                                                         |
| Right                                | 653                      | 0.55 (0.18 - 1.66)                                      | 0.72 (0.31 - 1.68)                                       | 0.90 (0.51 - 1.60)                                       | 0.75 (0.49 - 1.12)                                        |

‡ Significant at 99% Confidence intervals

- Unable to calculate due to low numbers

Results mutually adjusted for all the patient features in the table

The results of logistic regression from date of procedure to 90 days, 6 months, one year and 2 years in patients who were less than 80 years, PS 0 or 1 and stage IA are presented in S1 table. Overall, patients undergoing SABR were 2 times more likely to die after procedure which was only significant at 95% CI. There was no difference between the two groups at 90 days, 6 months and one year after the procedure by age, charlson index, pathologically confirmed diagnosis, laterality and affluent socioeconomic groups. Male sex, PS 1 and most deprived socioeconomic status were the only three characteristics that were significant at 99% confidence interval.

**Table S2: Regression analysis from date of diagnosis till death at 90 days, 6 months, one year and overall in patients aged <80 years, PS 0 or 1 and stage IA only**

|                                      | Total number of patients | Adjusted odds ratio at 90 days after procedure (95% CI) | Adjusted odds ratio at 180 days after procedure (95% CI) | Adjusted odds ratio at 365 days after procedure (95% CI) | Adjusted odd ratios at 730 days after procedure (95% CI)‡ |
|--------------------------------------|--------------------------|---------------------------------------------------------|----------------------------------------------------------|----------------------------------------------------------|-----------------------------------------------------------|
| <b>Type of Treatment</b>             |                          |                                                         |                                                          |                                                          |                                                           |
| Lobectomy                            | 954                      | 1                                                       | 1                                                        | 1                                                        | 1                                                         |
| SABR                                 | 138                      | 1.02 (0.12 - 8.62)                                      | 0.71 (0.08 - 5.72)                                       | 1.73 (0.65 - 4.61)                                       | 1.62 (0.80 - 3.24)                                        |
| <b>Sex</b>                           |                          |                                                         |                                                          |                                                          |                                                           |
| Female                               | 613                      | 1                                                       | 1                                                        | 1                                                        | 1                                                         |
| Male                                 | 479                      | 1.48 (0.45 - 4.87)                                      | 1.58 (0.58 - 4.30)                                       | 1.64 (0.87 - 3.09)                                       | 1.86 (1.22 - 2.83)‡                                       |
| <b>Age</b>                           |                          |                                                         |                                                          |                                                          |                                                           |
| <65                                  | 352                      | 1                                                       | 1                                                        | 1                                                        | 1                                                         |
| 65-80                                | 740                      | 2.30 (0.48 - 10.9)                                      | 1.40 (0.43 - 4.49)                                       | 1.69 (0.78 - 3.64)                                       | 1.25 (0.78 - 2.02)                                        |
| <b>Performance status</b>            |                          |                                                         |                                                          |                                                          |                                                           |
| 0                                    | 553                      | 1                                                       | 1                                                        | 1                                                        | 1                                                         |
| 1                                    | 539                      | 0.71 (0.21 - 2.38)                                      | 1.23 (0.44 - 3.42)                                       | 1.67 (0.86 - 3.26)                                       | 1.78 (1.14 - 2.77)                                        |
| <b>Charlson Index</b>                |                          |                                                         |                                                          |                                                          |                                                           |
| 0                                    | 420                      | 1                                                       | 1                                                        | 1                                                        | 1                                                         |
| 1                                    | 256                      | 0.45 (0.04 - 4.50)                                      | 0.26 (0.03 - 2.28)                                       | 0.88 (0.35 - 2.19)                                       | 1.18 (0.66 - 2.10)                                        |
| 2-3                                  | 253                      | 2.23 (0.49 - 9.98)                                      | 1.45 (0.42 - 5.03)                                       | 0.91 (0.38 - 2.17)                                       | 1.17 (0.67 - 2.06)                                        |
| 4+                                   | 163                      | 2.08 (0.38 - 11.1)                                      | 2.02 (0.45 - 7.45)                                       | 1.84 (0.80 - 4.22)                                       | 1.45 (0.79 - 2.63)                                        |
| <b>Socioeconomic Status</b>          |                          |                                                         |                                                          |                                                          |                                                           |
| 1                                    | 168                      | 1                                                       | 1                                                        | 1                                                        | 1                                                         |
| 2                                    | 204                      | -                                                       | -                                                        | 3.29 (0.68 - 15.8)                                       | 1.35 (0.57 - 3.19)                                        |
| 3                                    | 230                      | -                                                       | -                                                        | 2.97 (0.61 - 14.3)                                       | 1.61 (0.70 - 3.68)                                        |
| 4                                    | 236                      | -                                                       | -                                                        | 3.96 (0.85 - 18.4)                                       | 1.94 (0.86 - 4.38)                                        |
| 5 (most deprived)                    | 254                      | -                                                       | -                                                        | 5.04 (1.11 - 22.7)                                       | 2.81 (1.29 - 6.12)‡                                       |
| <b>Pathology confirmed diagnosis</b> |                          |                                                         |                                                          |                                                          |                                                           |
| No                                   | 73                       | 1                                                       | 1                                                        | 1                                                        | 1                                                         |
| Yes                                  | 1019                     | -                                                       | -                                                        | 2.35 (0.53 - 10.2)                                       | 1.01 (0.41 - 2.49)                                        |
| <b>Laterality</b>                    |                          |                                                         |                                                          |                                                          |                                                           |
| Left                                 | 439                      | 1                                                       | 1                                                        | 1                                                        | 1                                                         |
| Right                                | 653                      | 0.45 (0.14 - 1.47)                                      | 0.72 (0.27 - 1.90)                                       | 1.10 (0.58 - 2.08)                                       | 0.79 (0.52 - 1.19)                                        |

‡ Significant at 99% Confidence intervals

- Unable to calculate due to low numbers

Results mutually adjusted for all the patient features in the table

The results of logistic regression from date of diagnosis to 90 days, 6 months, one year and 2 years in patients who were less than 80 years, PS 0 or 1 and stage IA are presented in S2 table.

**Table S3: Regression analysis from date of procedure till death at 90 days, 6 months, one year and two years with 99% confidence intervals**

|                                      | Total number of patients | Adjusted odds ratio at 90 days after procedure (99% CI) | Adjusted odds ratio at 180 days after procedure (99% CI) | Adjusted odds ratio at 365 days after procedure (99% CI) | Adjusted odd ratio at 730 days after procedure (99% CI) |
|--------------------------------------|--------------------------|---------------------------------------------------------|----------------------------------------------------------|----------------------------------------------------------|---------------------------------------------------------|
| <b>Type of Treatment</b>             |                          |                                                         |                                                          |                                                          |                                                         |
| Lobectomy                            | 1897                     | 1                                                       | 1                                                        | 1                                                        | 1                                                       |
| SABR                                 | 476                      | 0.63 (0.15 - 2.55)                                      | 0.88 (0.34 - 2.26)                                       | 2.12 (1.18 - 3.80)                                       | 2.20 (1.40 - 3.45)                                      |
| <b>Sex</b>                           |                          |                                                         |                                                          |                                                          |                                                         |
| Female                               | 1259                     | 1                                                       | 1                                                        | 1                                                        | 1                                                       |
| Male                                 | 1114                     | 1.50 (0.70 - 3.20)                                      | 1.32 (0.74 - 2.36)                                       | 1.38 (0.92 - 2.07)                                       | 1.54 (1.13 - 2.09)                                      |
| <b>Age</b>                           |                          |                                                         |                                                          |                                                          |                                                         |
| <65                                  | 621                      | 1                                                       | 1                                                        | 1                                                        | 1                                                       |
| 65-80                                | 1470                     | 1.76 (0.61 - 5.04)                                      | 1.64 (0.71 - 3.75)                                       | 1.34 (0.78 - 2.31)                                       | 1.09 (0.74 - 1.61)                                      |
| >80                                  | 282                      | 2.57 (0.63 - 10.4)                                      | 2.54 (0.89 - 7.25)                                       | 1.74 (0.85 - 3.56)                                       | 1.76 (1.04 - 2.97)                                      |
| <b>Performance status</b>            |                          |                                                         |                                                          |                                                          |                                                         |
| 0                                    | 957                      | 1                                                       | 1                                                        | 1                                                        | 1                                                       |
| 1                                    | 1064                     | 1.63 (0.68 - 3.92)                                      | 1.77 (0.87 - 3.61)                                       | 1.38 (0.84 - 2.27)                                       | 1.46 (1.01 - 2.11)                                      |
| 2                                    | 352                      | 1.64 (0.46 - 5.78)                                      | 2.55 (1.02 - 6.37)                                       | 1.85 (0.99 - 3.46)                                       | 2.34 (1.47 - 3.72)                                      |
| <b>Stage</b>                         |                          |                                                         |                                                          |                                                          |                                                         |
| IA                                   | 1432                     | 1                                                       | 1                                                        | 1                                                        | 1                                                       |
| IB                                   | 941                      | 2.06 (0.95 - 4.47)                                      | 2.07 (1.14 - 3.74)                                       | 1.85 (1.22 - 2.80)                                       | 2.03 (1.48 - 2.78)                                      |
| <b>Charlson Index</b>                |                          |                                                         |                                                          |                                                          |                                                         |
| 0                                    | 894                      | 1                                                       | 1                                                        | 1                                                        | 1                                                       |
| 1                                    | 580                      | 1.12 (0.43 - 2.92)                                      | 0.97 (0.46 - 2.03)                                       | 1.22 (0.72 - 2.07)                                       | 1.37 (0.91 - 2.07)                                      |
| 2-3                                  | 568                      | 0.94 (0.34 - 2.58)                                      | 0.84 (0.39 - 1.82)                                       | 0.94 (0.54 - 1.64)                                       | 1.28 (0.85 - 1.93)                                      |
| 4+                                   | 331                      | 0.98 (0.29 - 3.29)                                      | 0.89 (0.35 - 2.23)                                       | 1.33 (0.72 - 2.42)                                       | 1.78 (1.12 - 2.80)                                      |
| <b>Socioeconomic Status</b>          |                          |                                                         |                                                          |                                                          |                                                         |
| 1                                    | 365                      | 1                                                       | 1                                                        | 1                                                        | 1                                                       |
| 2                                    | 435                      | 2.05 (0.43 - 9.63)                                      | 1.23 (0.45 - 3.30)                                       | 1.37 (0.63 - 2.95)                                       | 1.11 (0.63 - 1.96)                                      |
| 3                                    | 460                      | 1.42 (0.27 - 7.31)                                      | 0.87 (0.30 - 2.52)                                       | 1.29 (0.59 - 2.79)                                       | 1.16 (0.66 - 2.03)                                      |
| 4                                    | 527                      | 2.92 (0.67 - 12.6)                                      | 1.40 (0.54 - 3.61)                                       | 1.68 (0.81 - 3.47)                                       | 1.49 (0.88 - 2.54)                                      |
| 5 (most deprived)                    | 586                      | 2.14 (0.47 - 9.69)                                      | 0.98 (0.36 - 2.64)                                       | 1.72 (0.84 - 3.52)                                       | 1.72 (1.02 - 2.88)                                      |
| <b>Pathology confirmed diagnosis</b> |                          |                                                         |                                                          |                                                          |                                                         |
| No                                   | 240                      | 1                                                       | 1                                                        | 1                                                        | 1                                                       |
| Yes                                  | 2133                     | 1.06 (0.18 - 6.14)                                      | 0.92 (0.30 - 2.81)                                       | 1.05 (0.53 - 2.06)                                       | 1.05 (0.62 - 1.78)                                      |
| <b>Laterality</b>                    |                          |                                                         |                                                          |                                                          |                                                         |
| Left                                 | 941                      | 1                                                       | 1                                                        | 1                                                        | 1                                                       |
| Right                                | 1432                     | 1.11 (0.51 - 2.39)                                      | 0.93 (0.52 - 1.67)                                       | 1.04 (0.69 - 1.57)                                       | 0.93 (0.69 - 1.27)                                      |

**Table S4: Regression analysis from date of diagnosis till death at 90 days, 6 months, one year and two years with 99% confidence intervals**

|                                      | Total number of patients | Adjusted odds ratio at 90 days after procedure (99% CI) | Adjusted odds ratio at 180 days after procedure (99% CI) | Adjusted odds ratio at 365 days after procedure (99% CI) | Adjusted odds ratio at 730 days after procedure (99% CI) |
|--------------------------------------|--------------------------|---------------------------------------------------------|----------------------------------------------------------|----------------------------------------------------------|----------------------------------------------------------|
| <b>Type of Treatment</b>             |                          |                                                         |                                                          |                                                          |                                                          |
| Lobectomy                            | 1897                     | 1                                                       | 1                                                        | 1                                                        | 1                                                        |
| SABR                                 | 476                      | 0.26 (0.01 - 3.88)                                      | 0.29 (0.06 - 1.36)                                       | 1.25 (0.63 - 2.45)                                       | 1.89 (1.19 - 3.01)                                       |
| <b>Sex</b>                           |                          |                                                         |                                                          |                                                          |                                                          |
| Female                               | 1259                     | 1                                                       | 1                                                        | 1                                                        | 1                                                        |
| Male                                 | 1114                     | 1.40 (0.56 - 3.48)                                      | 1.46 (0.72 - 2.94)                                       | 1.46 (0.94 - 2.27)                                       | 1.47 (1.08 - 2.00)                                       |
| <b>Age</b>                           |                          |                                                         |                                                          |                                                          |                                                          |
| <65                                  | 621                      | 1                                                       | 1                                                        | 1                                                        | 1                                                        |
| 65-80                                | 1470                     | 2.27 (0.62 - 8.29)                                      | 1.74 (0.67 - 4.49)                                       | 1.58 (0.86 - 2.88)                                       | 1.09 (0.74 - 1.62)                                       |
| >80                                  | 282                      | 2.95 (0.47 - 18.4)                                      | 2.89 (0.79 - 10.5)                                       | 2.11 (0.96 - 4.67)                                       | 1.59 (0.93 - 2.72)                                       |
| <b>Performance status</b>            |                          |                                                         |                                                          |                                                          |                                                          |
| 0                                    | 957                      | 1                                                       | 1                                                        | 1                                                        | 1                                                        |
| 1                                    | 1064                     | 1.35 (0.52 - 3.47)                                      | 1.70 (0.75 - 3.86)                                       | 1.54 (0.90 - 2.62)                                       | 1.52 (1.04 - 2.20)                                       |
| 2                                    | 352                      | 0.30 (0.02 - 4.70)                                      | 2.62 (0.87 - 7.87)                                       | 2.22 (1.12 - 4.37)                                       | 2.35 (1.46 - 3.78)                                       |
| <b>Stage</b>                         |                          |                                                         |                                                          |                                                          |                                                          |
| IA                                   | 1432                     | 1                                                       | 1                                                        | 1                                                        | 1                                                        |
| IB                                   | 941                      | 2.15 (0.85 - 5.42)                                      | 2.05 (1.01 - 4.19)                                       | 1.93 (1.23 - 3.00)                                       | 2.00 (1.46 - 2.75)                                       |
| <b>Charlson Index</b>                |                          |                                                         |                                                          |                                                          |                                                          |
| 0                                    | 894                      | 1                                                       | 1                                                        | 1                                                        | 1                                                        |
| 1                                    | 580                      | 1.18 (0.37 - 3.74)                                      | 0.91 (0.36 - 2.27)                                       | 1.22 (0.69 - 2.16)                                       | 1.32 (0.88 - 2.00)                                       |
| 2-3                                  | 568                      | 1.23 (0.38 - 3.94)                                      | 0.95 (0.38 - 2.37)                                       | 0.90 (0.49 - 1.65)                                       | 1.17 (0.77 - 1.77)                                       |
| 4+                                   | 331                      | 0.99 (0.21 - 4.73)                                      | 1.05 (0.35 - 3.12)                                       | 1.42 (0.75 - 2.70)                                       | 1.67 (1.05 - 2.64)                                       |
| <b>Socioeconomic Status</b>          |                          |                                                         |                                                          |                                                          |                                                          |
| 1                                    | 365                      | 1                                                       | 1                                                        | 1                                                        | 1                                                        |
| 2                                    | 435                      | 1.96 (0.32 - 11.8)                                      | 1.82 (0.44 - 7.50)                                       | 1.47 (0.66 - 3.26)                                       | 1.19 (0.67 - 2.13)                                       |
| 3                                    | 460                      | 1.41 (0.21 - 9.51)                                      | 1.50 (0.34 - 6.48)                                       | 1.01 (0.43 - 2.35)                                       | 1.20 (0.67 - 2.13)                                       |
| 4                                    | 527                      | 2.60 (0.46 - 14.6)                                      | 2.39 (0.61 - 9.24)                                       | 1.51 (0.69 - 3.27)                                       | 1.53 (0.89 - 2.60)                                       |
| 5 (most deprived)                    | 586                      | 2.47 (0.43 - 14.0)                                      | 2.41 (0.63 - 9.25)                                       | 1.62 (0.76 - 3.46)                                       | 1.78 (1.05 - 3.03)                                       |
| <b>Pathology confirmed diagnosis</b> |                          |                                                         |                                                          |                                                          |                                                          |
| No                                   | 240                      | 1                                                       | 1                                                        | 1                                                        | 1                                                        |
| Yes                                  | 2133                     | -                                                       | 1.78 (0.19 - 16.4)                                       | 0.98 (0.44 - 2.16)                                       | 0.92 (0.54 - 1.59)                                       |
| <b>Laterality</b>                    |                          |                                                         |                                                          |                                                          |                                                          |
| Left                                 | 941                      | 1                                                       | 1                                                        | 1                                                        | 1                                                        |
| Right                                | 1432                     | 1.01 (0.41 - 2.52)                                      | 0.91 (0.45 - 1.83)                                       | 1.11 (0.71 - 1.74)                                       | 0.94 (0.69 - 1.28)                                       |
